# Supplementary material for: Investigating the adsorption of anisotropic diblock copolymer worms onto planar silica and nanocellulose surfaces using a quartz crystal microbalance
Source: Royal Society of Chemistry journal article supplement (doi:10.1039/d1py00644d), 2021-01-01
Supplement: d1py00644d1.pdf [file d1py00644d1.pdf]

## Supporting Information

### Investigating the Adsorption of Anisotropic Diblock Copolymer Worms onto Planar Silica and Nanocellulose Surfaces using a Quartz Crystal Microbalance

Joakim Engström,<sup>a,†</sup> Michael S. Reid,<sup>b</sup> Emma E. Brotherton,<sup>c</sup> Eva Malmström,<sup>a</sup> Steven P. Armes,<sup>c</sup> Fiona L. Hatton<sup>\*c†</sup>

<sup>a</sup> Division of Coating Technology and Wallenberg Wood Science Center, School of Engineering Sciences in Chemistry, Biotechnology and Health, Department of Fibre and Polymer Technology, KTH Royal Institute of Technology, SE-100 44 Stockholm, Sweden

<sup>b</sup> Division of Fibre Technology, School of Engineering Sciences in Chemistry, Biotechnology and Health, Department of Fibre and Polymer Technology, KTH Royal Institute of Technology, SE-100 44 Stockholm, Sweden

<sup>c</sup> Dainton Building, Department of Chemistry, University of Sheffield, Brook Hill, Sheffield, South Yorkshire, S3 7HF, UK

† Present address: Department of Materials, Loughborough University, Loughborough, LE11 3TU, UK.

‡ Present address: Departments of Bioengineering and Materials Science and Engineering, University of California, Berkeley, 210 Hearst Mining Building, Berkeley, CA 94720, USA

Electronic Supplementary Information (ESI) available: [details of any supplementary information available should be included here]. See DOI: 10.1039/x0xx00000x

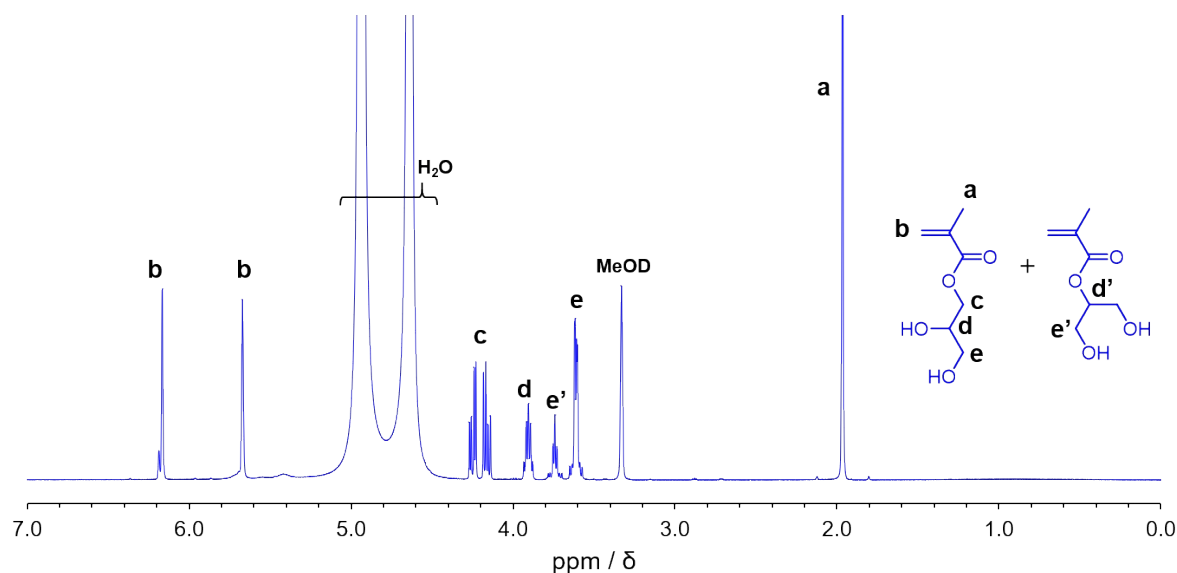

**Figure S1.** <sup>1</sup>H NMR (400 MHz, CD<sub>3</sub>OD) spectrum obtained for glycerol monomethacrylate (GMA) prepared by hydrolysis of glycidyl methacrylate (GlyMA).

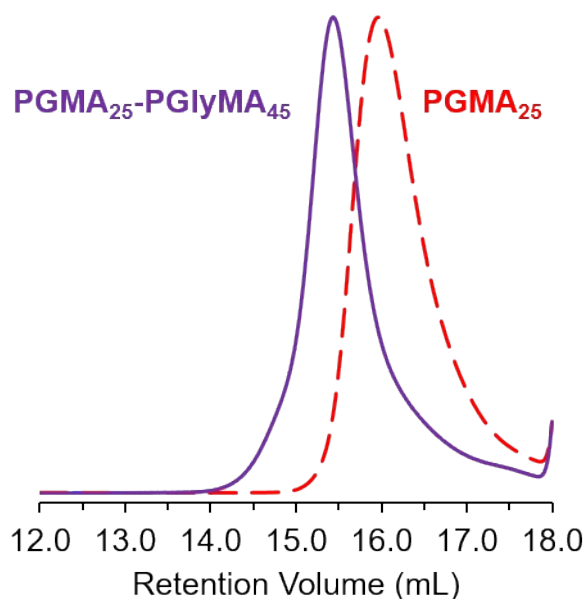

**Figure S2.** Overlaid DMF GPC chromatograms recorded for the PGMA<sub>25</sub> homopolymer precursor and the PGMA<sub>45</sub>-PGlyMA<sub>25</sub> diblock copolymer prepared at 15% w/w solids by RAFT aqueous emulsion polymerization of GlyMA.

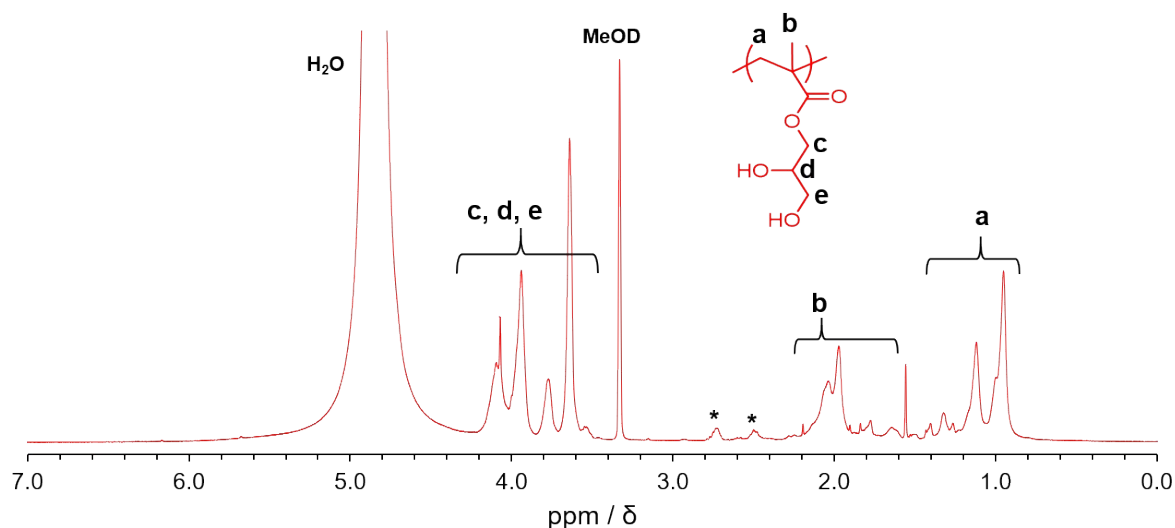

**Figure S3.** <sup>1</sup>H NMR (400 MHz, CD<sub>3</sub>OD) spectrum recorded for the PGMA<sub>25</sub> precursor. The reaction mixture was sampled after the RAFT aqueous solution polymerization of GMA for 3 h and diluted with CD<sub>3</sub>OD. Asterisks (\*) indicate peaks arising from chain-ends originating from use of the CECPA RAFT agent; the signal at 2.73 ppm corresponds to two CH<sub>2</sub> protons (HOOC-CH<sub>2</sub>-CH<sub>2</sub>-S-C(=S)-S-), while the signal at 2.50 ppm corresponds to four CH<sub>2</sub> protons (-C(CN)(CH<sub>3</sub>)-CH<sub>2</sub>-CH<sub>2</sub>-COOH).

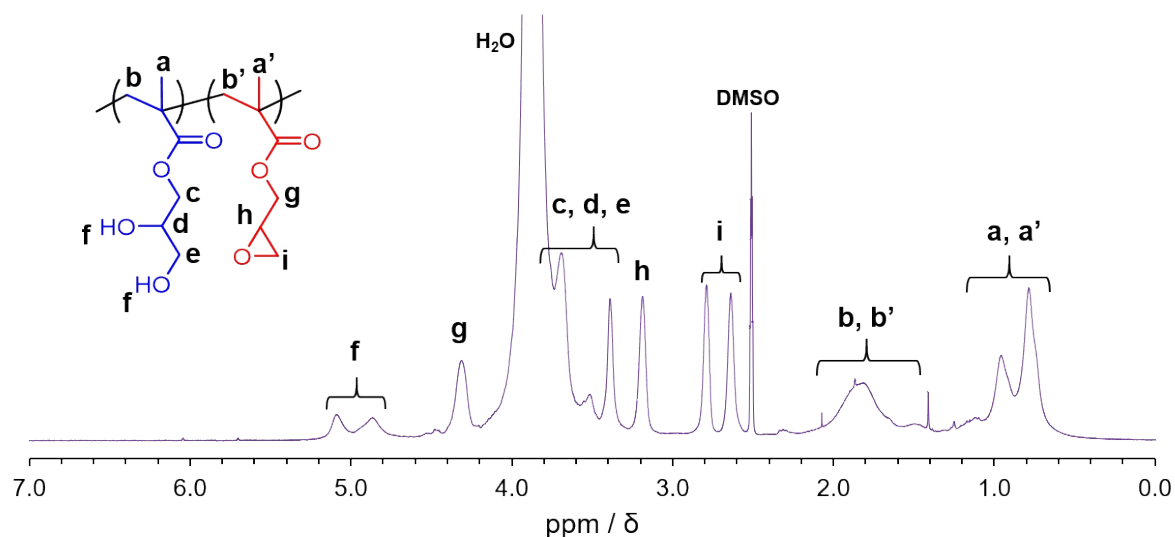

**Figure S4.**  $^1\text{H}$  NMR (400 MHz,  $d_6$ -DMSO) spectrum recorded for the PGMA<sub>25</sub>-PGlyMA<sub>45</sub> diblock copolymer prepared by RAFT aqueous emulsion polymerization of GlyMA. An aliquot from the final reaction mixture was diluted with  $d_6$ -DMSO.

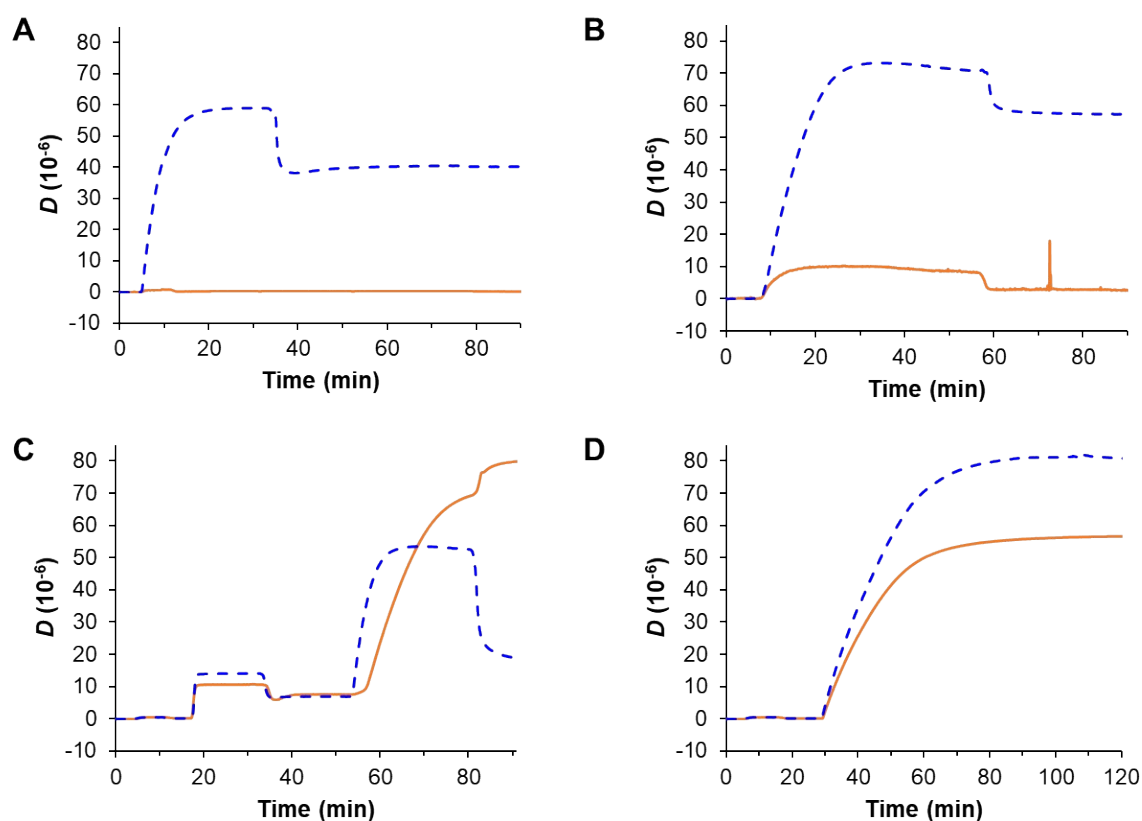

**Figure S5.** QCM-D dissipation ( $D$ ) monitoring at a flow rate of  $0.15 \text{ mL min}^{-1}$  during adsorption of  $0.1 \text{ g dm}^{-3}$  aqueous dispersions of either anionic PGMA<sub>25</sub>-PGlyMA<sub>45</sub> worms (orange solid lines) or cationic crosslinked PGMA<sub>25</sub>-P(GlyMA.EDA)<sub>45</sub> worms (blue dashed lines) on the following surfaces: (A) silica, (B) CNCs, (C) CNFs and (D) PEI-coated silica.

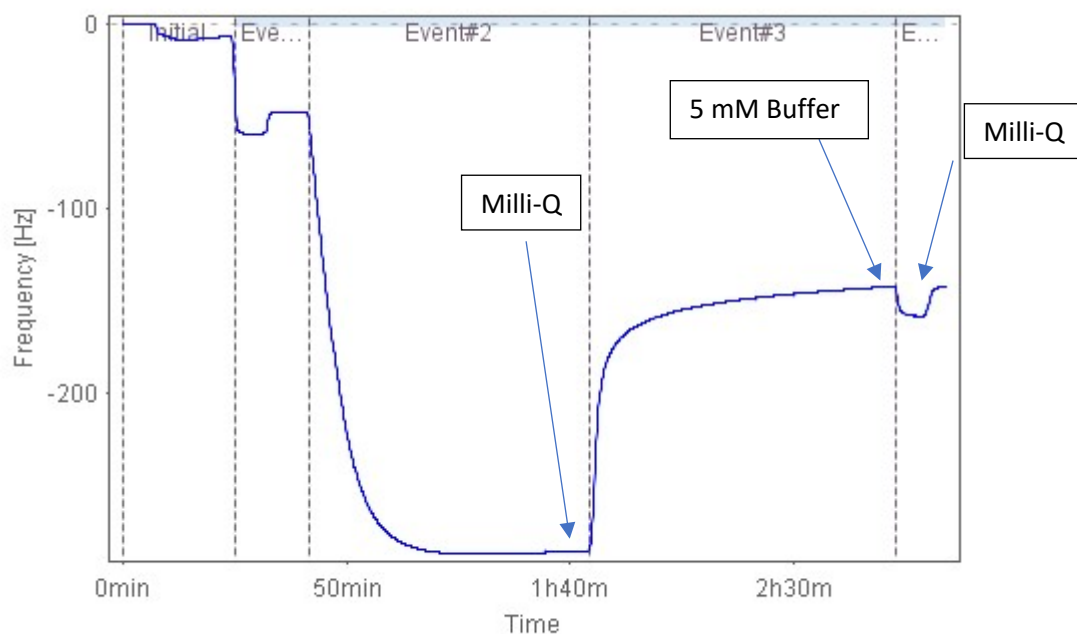

**Figure S6.** QCM-D analysis of the adsorption of cationic cross-linked PGMA<sub>25</sub>-P(Gly-EDA)<sub>45</sub> worms onto an *in situ* generated CNF surface. The introduction of buffer, as marked after the rinsing step using Milli-Q water, is shown to indicate the effect of counter-ion exchange on the frequency shift ( $\Delta f = 18$  Hz)

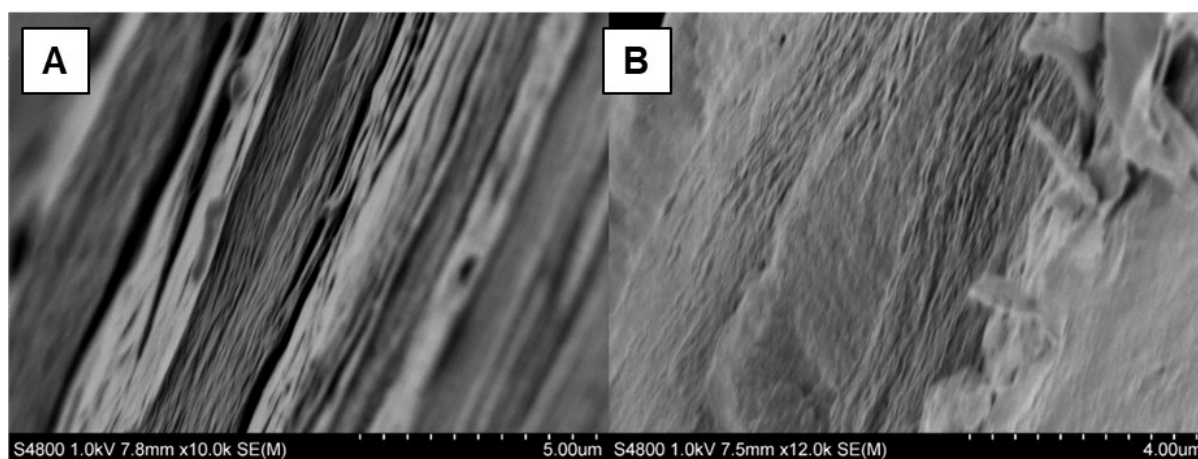

**Figure S7.** Field emission SEM images recorded for cross-sectioned worm/CNF nanocomposite films comprising 75% CNF by mass, with the remaining 25% mass being made up by either (A) anionic linear PGMA<sub>25</sub>-PGlyMA<sub>45</sub> worms or (B) cationic cross-linked PGMA<sub>25</sub>-P(Gly-EDA)<sub>45</sub> copolymer worms.

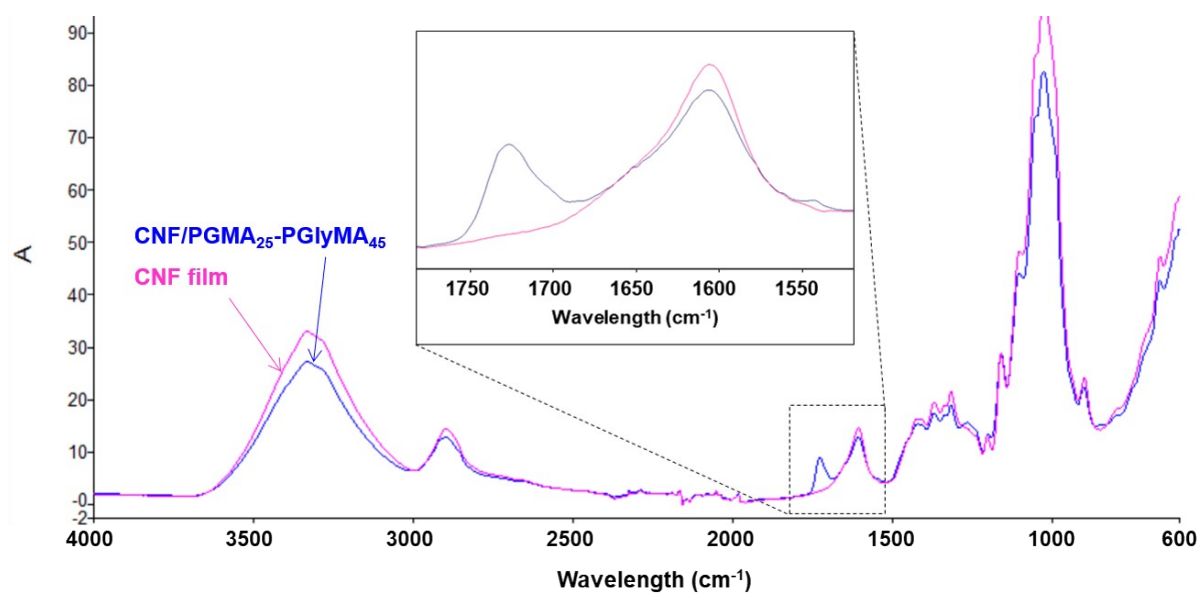

**Figure S8.** FTIR spectra for the CNF film (pink) and CNF/PGMA<sub>25</sub>-PGlyMA<sub>45</sub> composite film (blue), comprising 25% w/w anionic PGMA<sub>25</sub>-PGlyMA<sub>45</sub> copolymer worms and 75% w/w CNF. Inset shows the region 1500-1790 cm<sup>-1</sup>.
